# Supplementary material for: IGF2 interacts with the imprinted gene Cdkn1c to promote terminal differentiation of neural stem cells
Source: Oxford University Press journal article supplement (doi:10.1242/dev.200563), 2023-01-01
Supplement: dev200563supp.pdf [file dev200563supp.pdf]

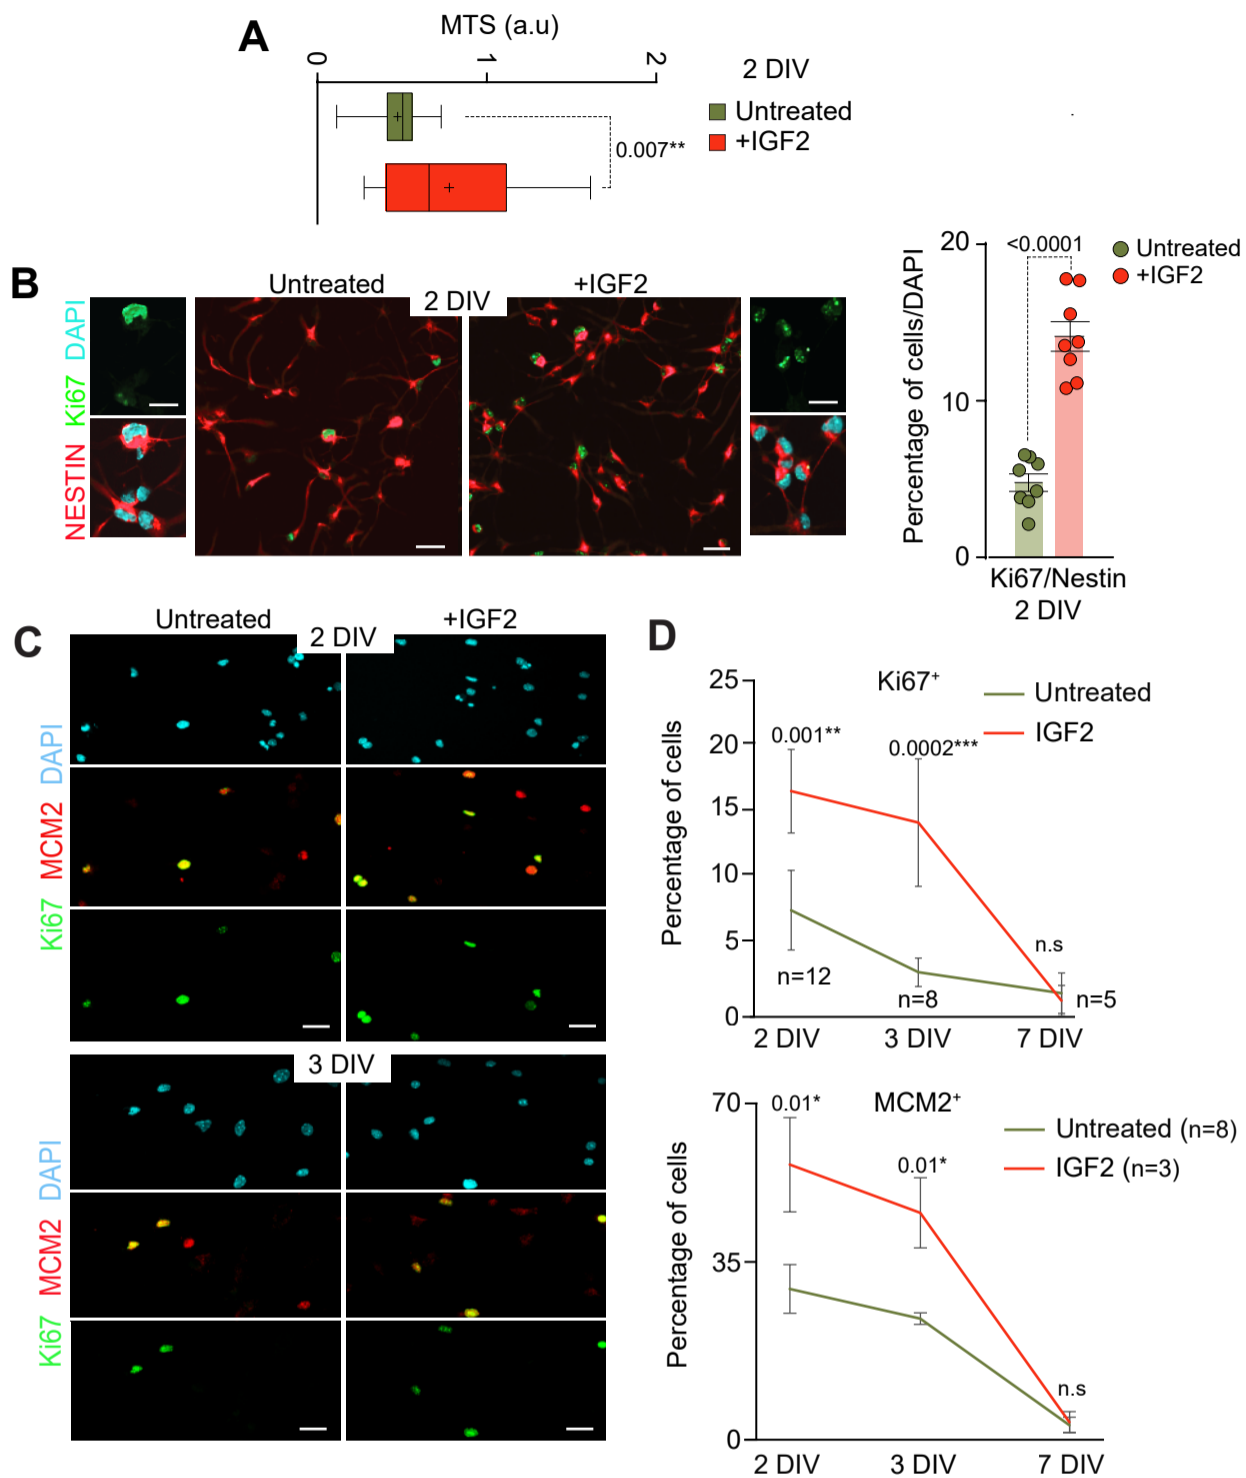

**Fig. S1. Differentiation of NSCs with IGF2 promotes cell cycle maintenance .** (A) MTS assay performed after 2 DIV of differentiation in presence or absence of IGF2, measured as arbitrary units (a.u.). Boxes indicate interquartile range and whiskers indicate maximum and minimum values;  $n=20$  and 13 experimental replicates respectively (two-tailed unpaired Student's *t*-test). (B) Immunocytochemistry images for Nestin (red) and Ki67 (green) in NSCs after 2 DIV of differentiation in presence or absence of IGF2. High magnification images are also shown (left panel). Quantification of the percentage of Ki67/Nestin<sup>+</sup> cells in NSCs after 2 DIV of differentiation in presence or absence of IGF2 (right panel). Data are mean $\pm$ s.e.m;  $n=8$  experimental replicates (two-tailed paired Student's *t*-test). (C) Immunocytochemistry confocal images for Ki67 (green), MCM2 (red) and DAPI (cyan) in NSCs after 2 and 3 DIV of differentiation in presence or absence of IGF2. (D) Percentage of cells positive for Ki67 and MCM2 in untreated and IGF2-treated cultures after 2, 3 and 7 DIV in differentiation-promoting conditions. Data are mean $\pm$ s.e.m;  $n=12$ , 8 and 5 experimental replicates for Ki67<sup>+</sup> cells;  $n=8$  and 3 experimental replicates respectively (Mann-Whitney test). DAPI was used to counterstain DNA. P-values and number of samples are indicated. Scale bars in B and C: 30  $\mu$ m; High magnification in B: 10  $\mu$ m.

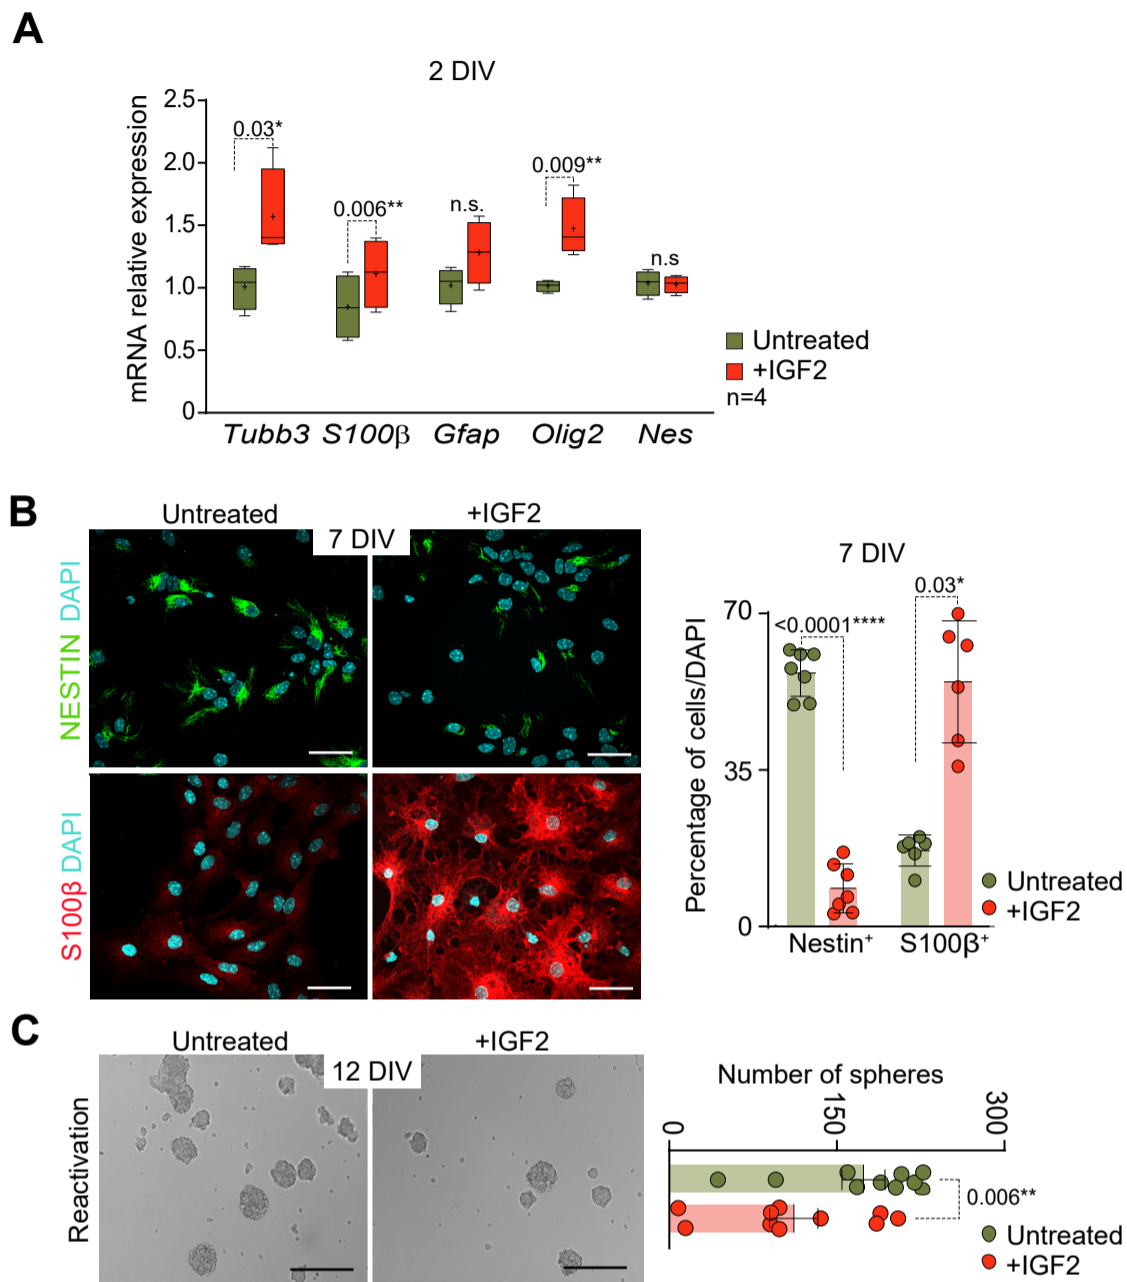

**Fig. S2. IGF2 promotes terminal differentiation of NSCs.** (A) qPCR for  $\beta$ III-tubulin (*Tubb3*), *S100β*, *Gfap*, *Olig2* and *Nestin* (*Nes*) genes in NSCs after 2 DIV in differentiation conditions in presence or absence of IGF2. *Gapdh* was used as housekeeping gene. Boxes indicate interquartile range and whiskers indicate maximum and minimum values; n=4 experimental replicates (two-tailed unpaired Student's t-test). (B) Immunocytochemistry images for Nestin (green) and *S100β* (red) in untreated and IGF2-treated cultures after 7 DIV of differentiation (left panel). Percentage of cells positive for Nestin and *S100β* after 7 DIV of differentiation in presence or absence of IGF2 (right panel). DAPI was used to counterstain DNA. Data are mean±s.e.m; n=6 experimental replicates (two-tailed paired Student's t-test). (C) Representative images of neurospheres formed by differentiated cultures in the reactivation assay in presence or absence of IGF2 (left panel). Number of spheres formed after reactivation by detaching 7 DIV-differentiated NSCs and replating them for 5 more days in proliferation-promoting conditions in presence or absence of IGF2 (right panel). Data are mean±s.e.m; n=10 experimental replicates (Wilcoxon matched-pairs signed rank test). P-values and number of samples are indicated. Scale bars in B: 30 μm; in C: 100 μm.

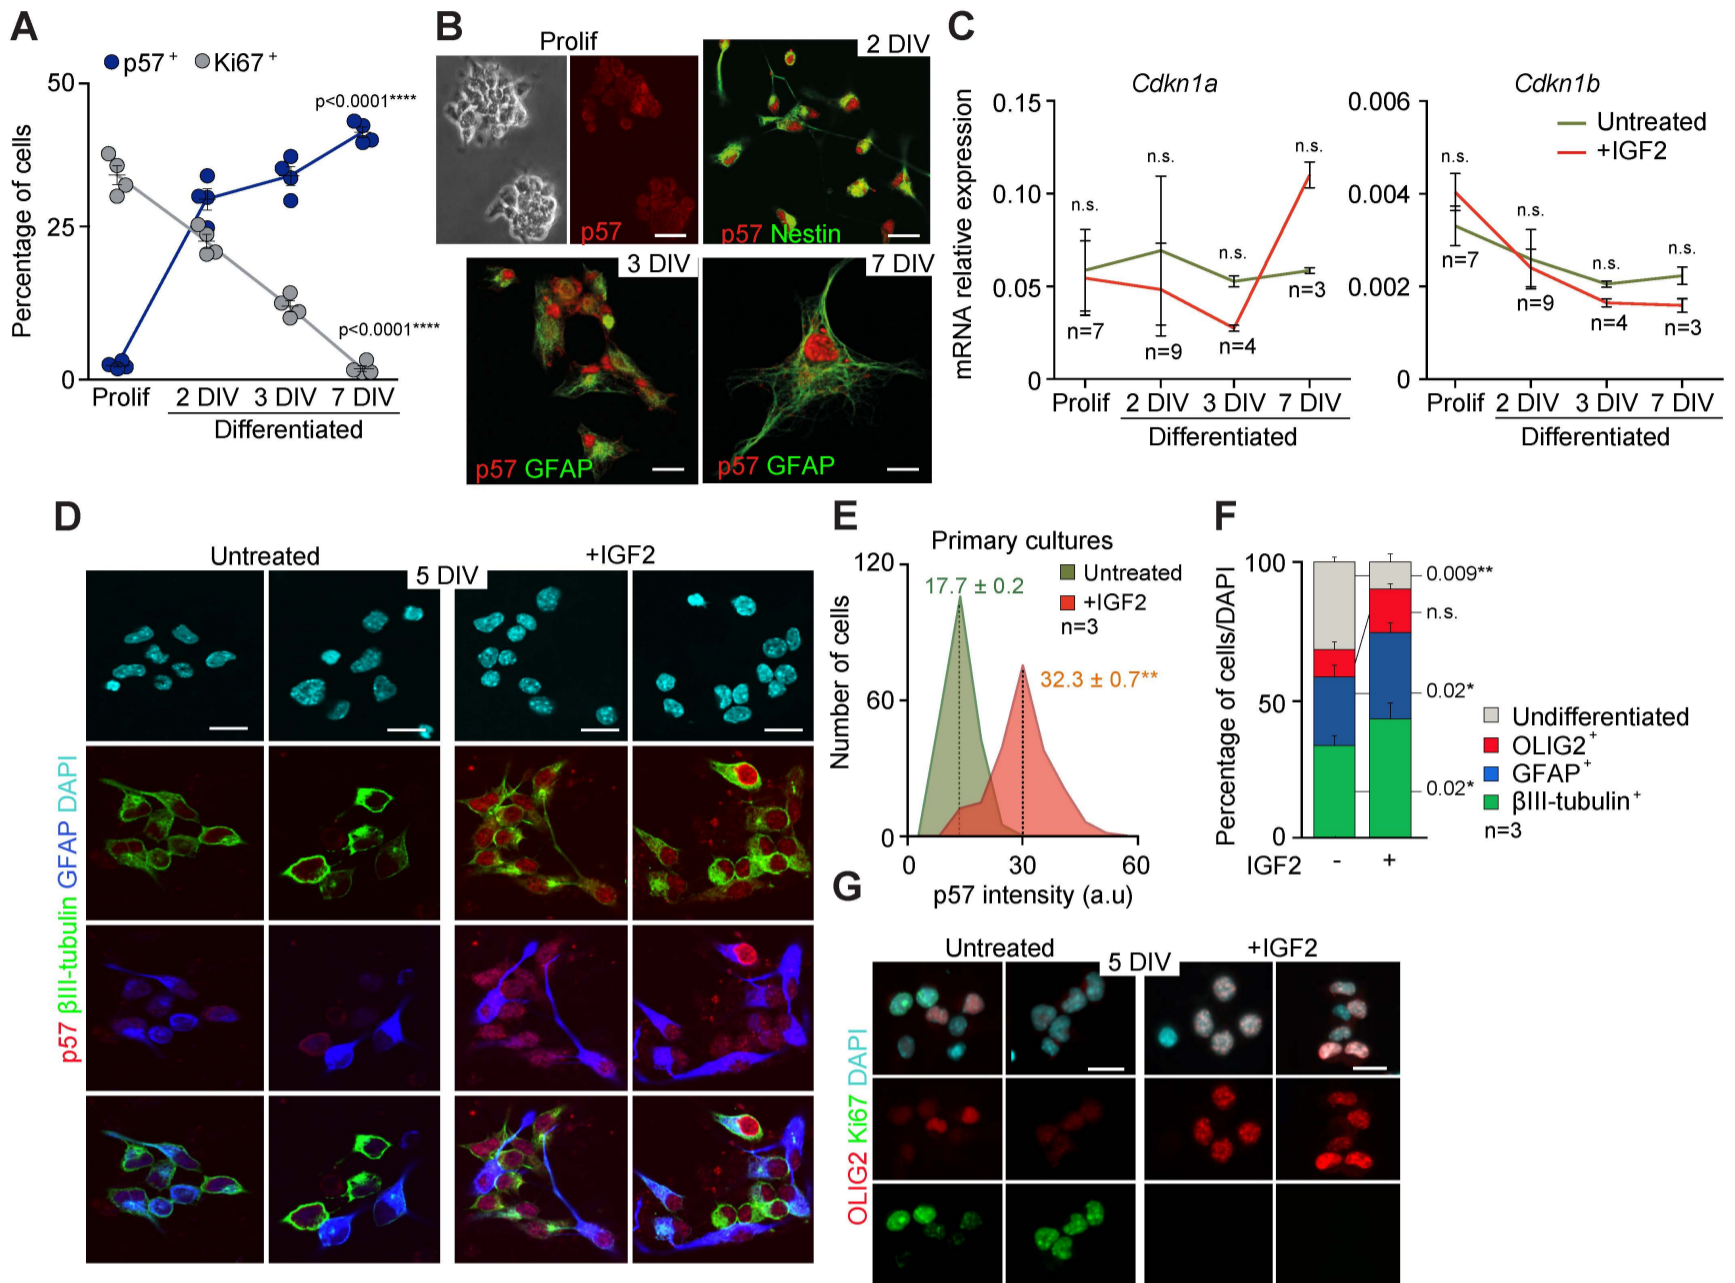

**Fig. S3. IGF2 induces expression of p57 and differentiation of adult NSCs in primary cultures in the absence of mitogens.** (A) Percentage of cells positive for p57 and Ki67 in NSCs cultures in proliferation conditions and after 2, 3 and 7 DIV of differentiation. Data are mean ± s.e.m; n=4 experimental replicates (Two-way ANOVA with a post-hoc Tukey test). (B) Immunocytochemistry for p57 (red), Nestin (green) and GFAP (green) in NSCs in proliferation and after 2, 3 and 7 DIV of differentiation. (C) qPCR for *Cdkn1a* and *Cdkn1b* in NSCs in proliferation conditions and after 2, 3 and 7 DIV of differentiation. *Gapdh* was used as housekeeping gene. Data are mean ± s.e.m; n=7, 9, 4 and 3 experimental replicates respectively (Wilcoxon matched-pairs signed rank test). (D) Immunocytochemistry images for p57 (red), βIII-tubulin (green) and GFAP (blue) in primary cultures from the adult SVZ in absence or presence of IGF2 after 5 DIV of differentiation-promoting conditions. The percentage of undifferentiated cells is also determined. Data are mean ± s.e.m; n=3 experimental replicates (two-tailed paired Student's t-test). (E) Histograms showing p57 intensity (in arbitrary units, a.u) in primary cultures from the SVZ in presence or absence of IGF2 after 5 DIV of differentiation. (F) Percentage of cells positive for β III-tubulin, Olig2 or GFAP in untreated and in IGF2-treated cultures after 5 DIV of differentiation. The percentage of undifferentiated cells is also determined. Data are mean ± s.e.m; n=3 experimental replicates (two-tailed paired Student's t-test). (G) Immunocytochemistry for OLIG2 (red) and Ki67 (green) in primary cultures isolated from the adult SVZ that have been treated or not with IGF2. DAPI was used to counterstain DNA. Number of samples and P-values are indicated. Scale bars in B, D and G: 30 μm.

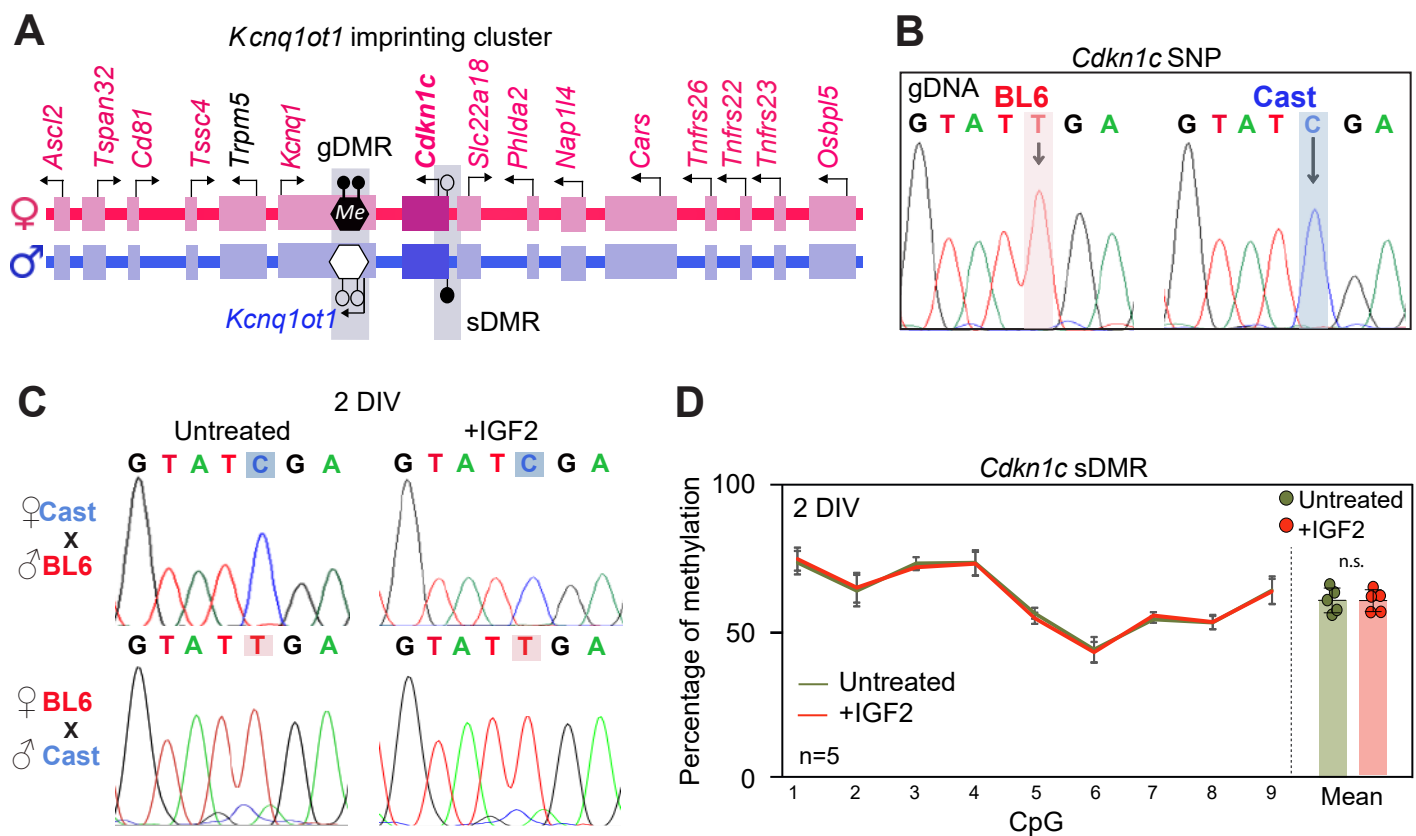

**Fig. S4. Genomic imprinting of the *Cdkn1c* gene is maintained after IGF2 treatment.** (A) Schematic of the *Cdkn1c* imprinted cluster. Expression of the maternally (pink) and paternally (blue) expressed genes within the cluster is shown. The methylation status of the *Cdkn1c* somatic DMR (sDMR) is illustrated with open and filled circles representing full methylation at the paternal allele and lack of methylation at the maternal allele, respectively. Germline-derived DMR (gDMR) is also represented. (B) Sequence analysis of gDNA from adult NSCs derived from *Mus musculus domesticus* (abbreviated BL6) and *Mus musculus castaneus* (abbreviated Cast) mice. Sequence traces show a polymorphism at the *Cdkn1c* gene (T/C). (C) Sequence analysis of RT-PCR products from adult NSCs derived from reciprocal F1 hybrids mice from BL6 and Cast (CastxBL6 and BL6xCast) after being treated or not with IGF2 in differentiation conditions. (D) Percentage of methylation determined by bisulfite sequencing and pyrosequencing at 9 CpG sites within the sDMR of *Cdkn1c* in untreated or IGF2-treated after 2 DIV of differentiation. Mean percentage of methylation is also indicated. Data are mean $\pm$ s.e.m; n=5 experimental replicates (Mann-Whitney test). Number of samples is indicated.



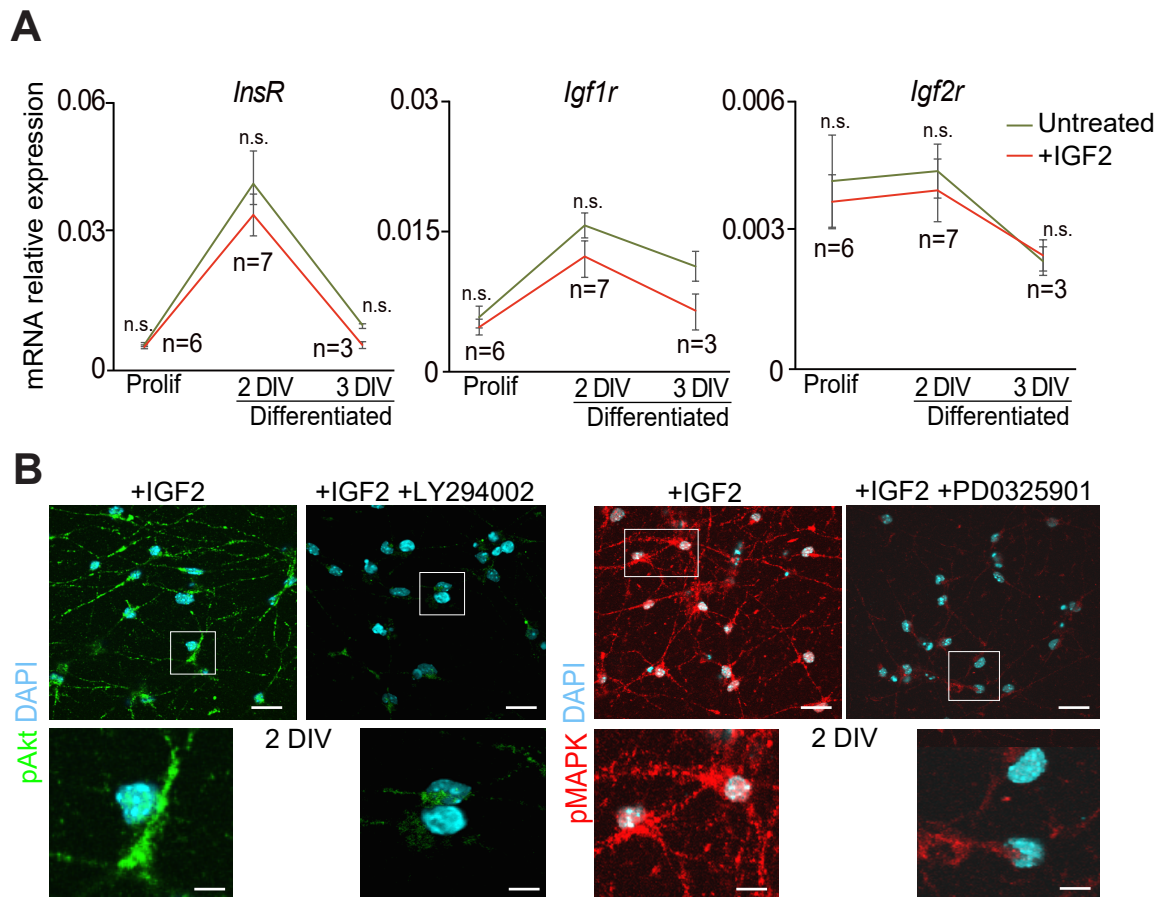

**Fig. S5. Mechanism of action of IGF2 in NSCs during differentiation.** (A) qPCR for insulin receptor (*Insr*), Igf1 receptor (*Igf1r*) and Igf2 receptor (*Igf2r*) genes in NSCs in proli-ferating conditions (Prolif) and after 2 and 3 DIV of differentiation in presence or absence of IGF2. *Gapdh* was used as housekeeping gene. Data are mean $\pm$ s.e.m; n=6, 7 and 3 experimental replicates respectively (Mann-Whitney test). (B) Immunocytochemistry images for pAkt (green) and pMAPK (red) in NSCs after 2 DIV of differentiation in presence of IGF2 and after treatment with the PI3K inhibitor LY294002 or the ERK1/2 inhibitor PD0325901. DAPI was used to counterstain DNA. Scale bars in B: 30  $\mu$ m (high magnification images in B: 10  $\mu$ m).

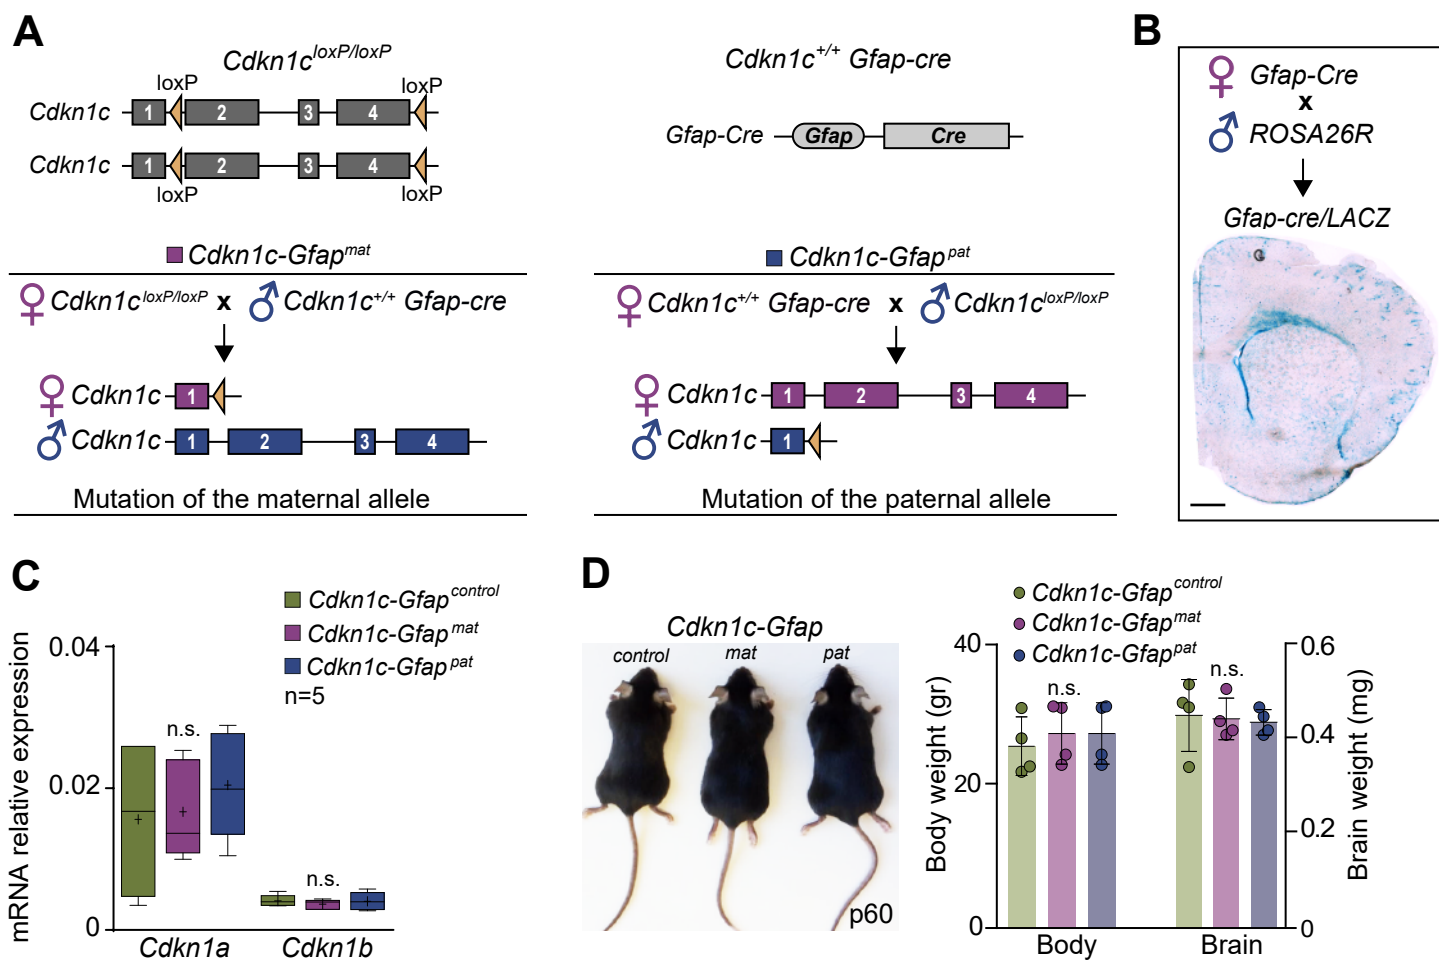

**Fig. S6. Conditional deletion of *Cdkn1c* in a murine model.** (A) Schematic of the conditional murine model. Mice with the mutation of *Cdkn1c* at the maternal allele (*Cdkn1c-Gfap*<sup>mat</sup>) were generated by crossing *Cdkn1c* floxed females with GFAP-cre males. Reciprocally, mice with a mutation in the paternal allele (*Cdkn1c-Gfap*<sup>pat</sup>) were generated by crossing GFAP-cre females with *Cdkn1c* floxed males. (B)  $\beta$ -galactosidase staining (blue) in the brain of *Gfap-CRE/LACZ* mice. (C) qPCR for *Cdkn1a* and *Cdkn1b* in *Cdkn1c-Gfap*<sup>control</sup>, *Cdkn1c-Gfap*<sup>mat</sup> and *Cdkn1c-Gfap*<sup>pat</sup> NSCs in proliferation conditions. *Gapdh* was used as housekeeping gene. Boxes indicate interquartile range and whiskers indicate maximum and minimum values; n=5 experimental replicates (Two-way ANOVA with a post-hoc Tukey test). (D) Images of *Cdkn1c-Gfap*<sup>control</sup>, *Cdkn1c-Gfap*<sup>mat</sup> and *Cdkn1c-Gfap*<sup>pat</sup> mice (left panel). Body and brain weights in postnatal day (p)60 mice from the three genotypes (right panel). Data are mean  $\pm$  s.e.m; n=4 experimental replicates (Two-way ANOVA with a post-hoc Tukey test). Number of samples and P-values are indicated.

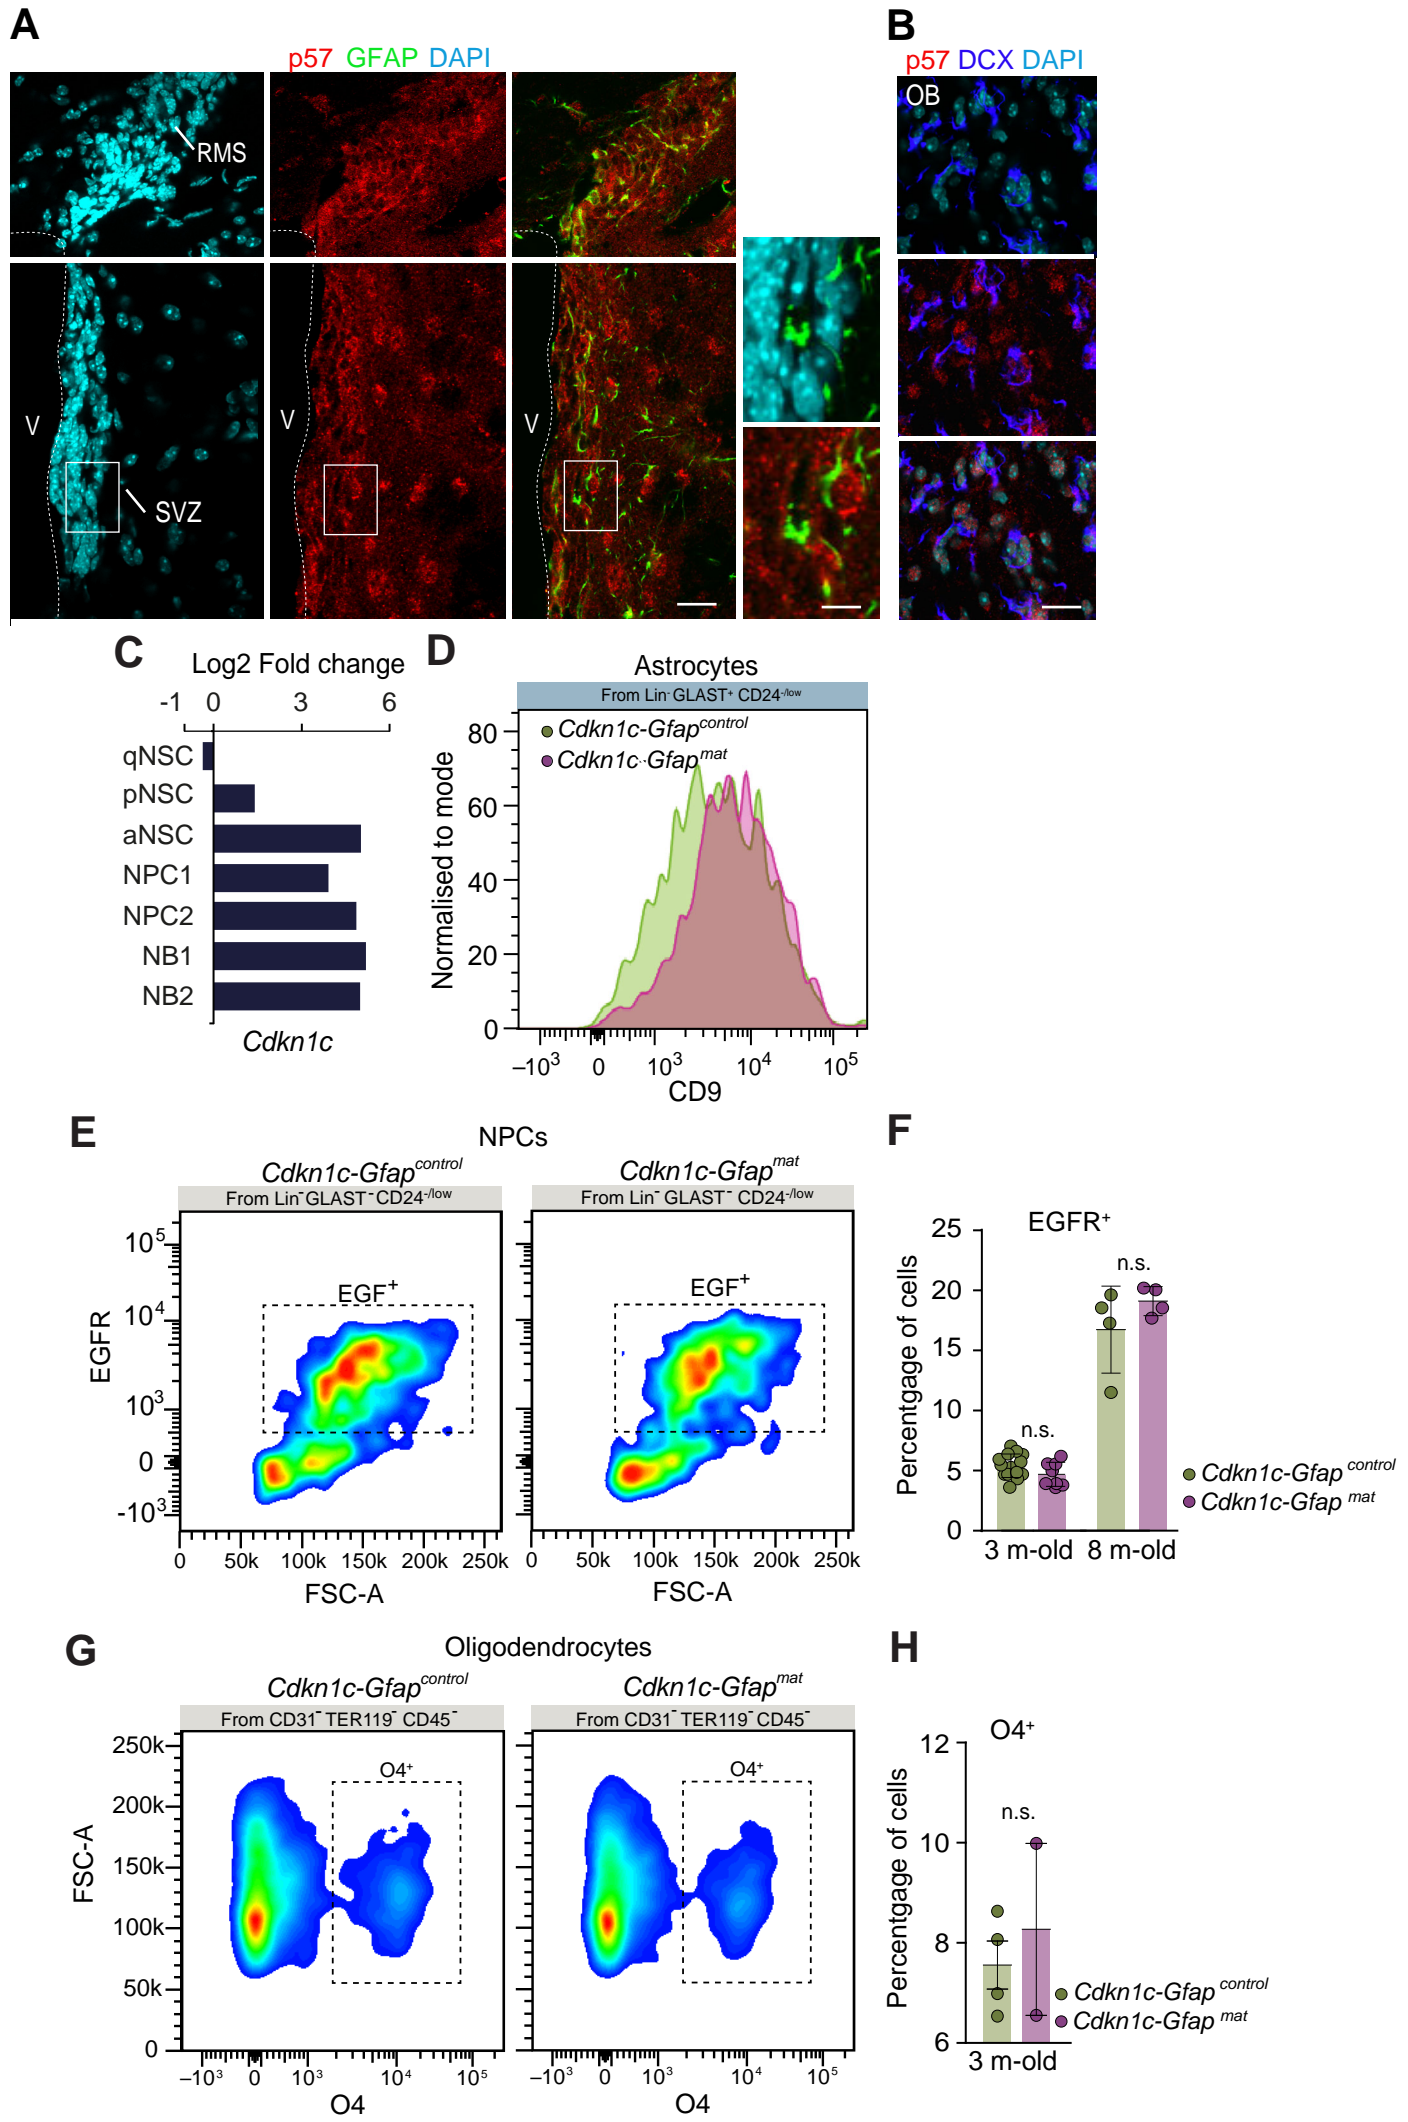

**Fig. S7. p57 is expressed in the adult SVZ.** **(A)** Immunohistochemistry confocal images for p57 (red) and GFAP (green) in the RMS and SVZ of wild-type mice. **(B)** Immunohistochemistry confocal images for p57 (red) and DCX (blue) in the OB of wild-type mice. **(C)** RNAseq data represented as Log2 Fold change for *Cdkn1c* in FACs isolated cells from the adult SVZ of wild-type mice. **(D)** Histograms showing CD9 intensity in cells isolated from the SVZ of *Cdkn1c-Gfap<sup>control</sup>* and *Cdkn1c-Gfap<sup>mat</sup>* mice. **(E)** Flow cytometry analysis of the EGFR<sup>+</sup> neural progenitor (NPCs) population in the SVZ of *Cdkn1c-Gfap<sup>control</sup>* and *Cdkn1c-Gfap<sup>mat</sup>* mice. **(F)** Percentage of EGFR<sup>+</sup> cells analysed by flow cytometry in the SVZ of 3 months-old and 8 months-old mice. Data are mean±s.e.m; n=8, 5, 4 and 4 experimental replicates respectively (Two-way ANOVA with a post-hoc Tukey test). **(G)** Flow cytometry analysis of the O4<sup>+</sup> oligodendrocyte population in the SVZ of *Cdkn1c-Gfap<sup>control</sup>* and *Cdkn1c-Gfap<sup>mat</sup>* mice. **(H)** Percentage of O4<sup>+</sup> cells analysed by flow cytometry in the SVZ of 3 months-old mice. DAPI was used to counterstain DNA. V: ventricular lumen. Data are mean±s.e.m; n=4 and 2 experimental replicates respectively (Mann-Whitney test). Scale bars in A and B: 30 µm (high magnifications in A: 10 µm).



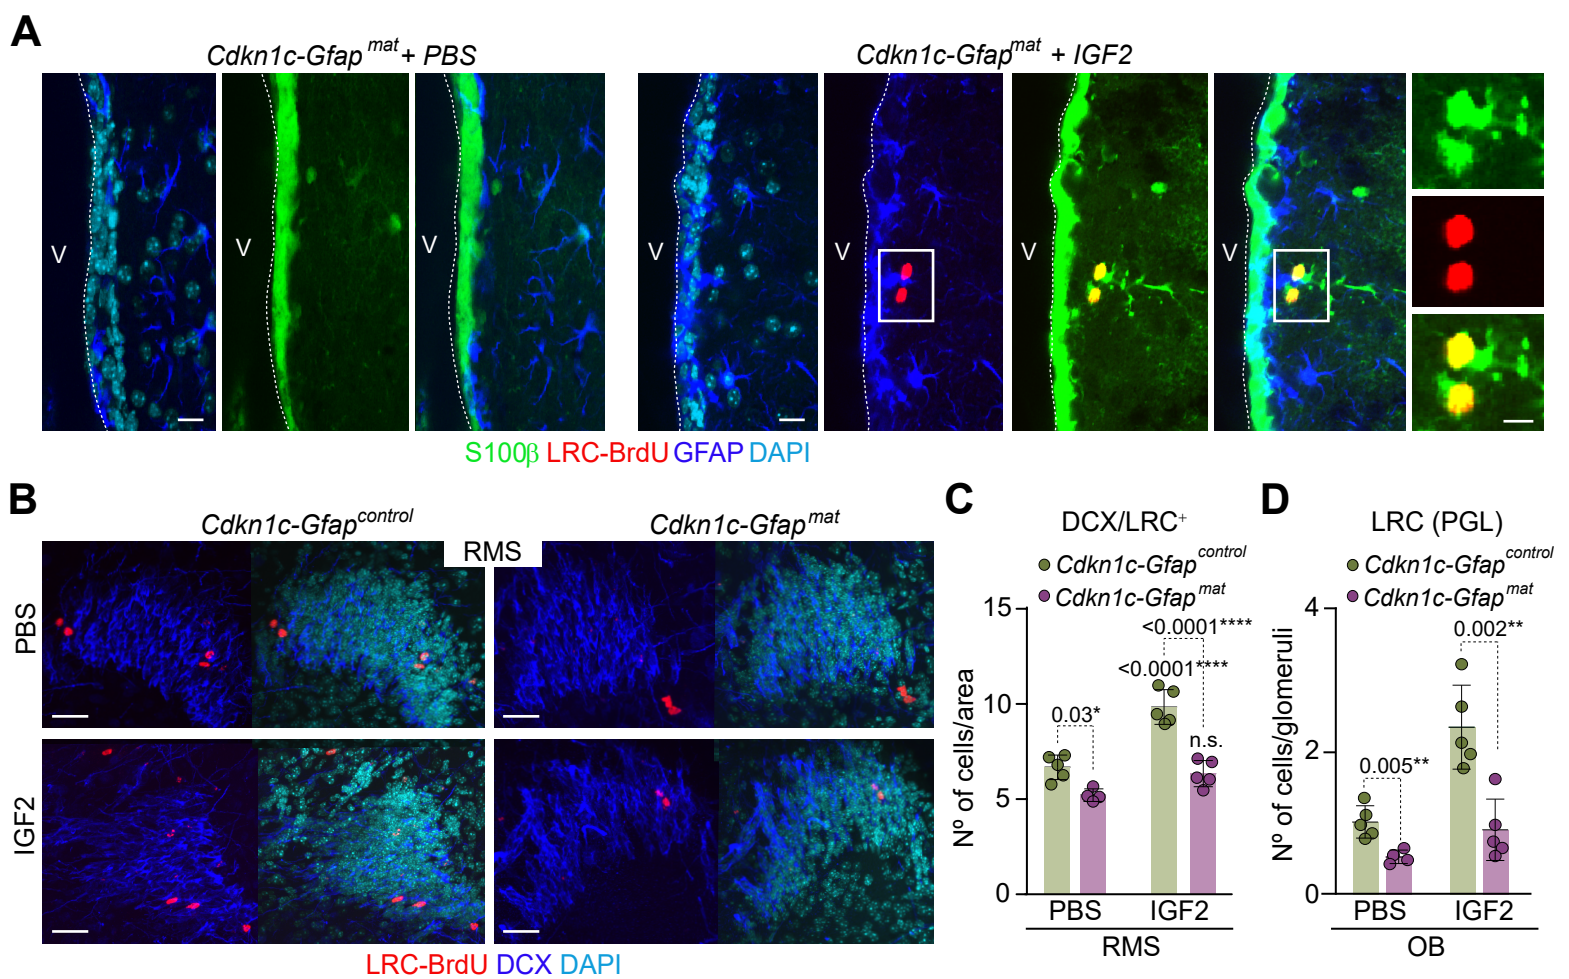

**Fig. S8. Ventricular infusion of IGF2 induces astrocytic differentiation of NSCs. (A)** Immunohistochemistry confocal images for S100 $\beta$  (green), GFAP (blue) and BrdU-LRC (red) in the SVZ of *Cdkn1c-Gfap<sup>control</sup>* and *Cdkn1c-Gfap<sup>mat</sup>* mice after infusion of PBS or IGF2. **(B)** Immunohistochemistry confocal images for BrdU-LRC (red) and DCX (blue) in the SVZ of *Cdkn1c-Gfap<sup>control</sup>* and *Cdkn1c-Gfap<sup>mat</sup>* mice after infusion of PBS or IGF2. **(C)** Quantification of the number of DCX/BrdU-LRC<sup>+</sup> neuroblasts migrating through the RMS of *Cdkn1c-Gfap<sup>control</sup>* and *Cdkn1c-Gfap<sup>mat</sup>* mice after the infusion of PBS or IGF2. Data are mean  $\pm$  s.e.m; n=8, 5, 4 and 4 experimental replicates respectively (Two-way ANOVA with a post-hoc Tukey test). **(D)** Quantification of the number of BrdU-LRC<sup>+</sup> cells in the periglomerular layer (PGL) of the OB in *Cdkn1c-Gfap<sup>control</sup>* and *Cdkn1c-Gfap<sup>mat</sup>* mice after infusion of PBS or IGF2. DAPI was used to counterstain DNA. Data are mean  $\pm$  s.e.m; n=5 experimental replicates (Two-way ANOVA with a post-hoc Tukey test). V: ventricular lumen. P-values are indicated. Scale bars in A and B: 30  $\mu$ m (high magnification in A: 7  $\mu$ m).

**Table S1. List of primers used.**

| Gene                   | Sequence (5'-3')         | Application       |
|------------------------|--------------------------|-------------------|
| p57 CKO-F              | AAGCTGGACAGGACAAGCGATCC  | Genotyping        |
| p57 CKO-R              | ATGGTCGAAGGCTGTGCAAACGC  | Genotyping        |
| p57 3'-Rv              | GTTCTCGCACACAACTAGATCAG  | Genotyping        |
| <i>Cdkn1c</i> METH-F   | AGGATTTAGTTGGTAGTAGTAGG  | Methylation study |
| <i>Cdkn1c</i> METH-R   | AACCATAAACTAAACACAACCCC  | Methylation study |
| <i>Cdkn1c</i> METH-seq | GGTGTAGTTTTAGGGTTAG      | Methylation study |
| <i>Cdkn1c</i> SNP-F    | TAGCAGGAACCGGAGATGG      | SNP Sequencing    |
| <i>Cdkn1c</i> SNP-R    | ACACCTTGGGACCAGCGTACT    | SNP Sequencing    |
| <i>Cre</i> -F          | GCGGTCTGGCAGTAAAACTATC   | Genotyping        |
| <i>Cre</i> -R          | GTGAAACAGCATTGCTGCTCACTT | Genotyping        |

**Table S2. List of primary antibodies used.**

| Antibody                         | Source         | Host    | Dilution | Cat #       | Application |
|----------------------------------|----------------|---------|----------|-------------|-------------|
| $\beta$ III-tubulin              | Covance        | Mouse   | 1/300    | PRB-435P    | ICC         |
| BrdU                             | Abcam          | Rat     | 1/600    | Ab6326      | IHC         |
| CD24-PerCP-Cy5.5                 | BD Biosciences | Rat     | 1/300    | 562360      | FC          |
| CD31-BUV421                      | BD Biosciences | Rat     | 1/100    | 563356      | FC          |
| CD45-BUV421                      | BD Biosciences | Rat     | 1/200    | 563890      | FC          |
| CD9-Vio770                       | Miltenyi       | Rat     | 1/20     | 130-102-384 | FC          |
| DCX                              | Santa Cruz     | Mouse   | 1/500    | sc-271390   | IHC         |
| GAPDH                            | Millipore      | Mouse   | 1/5000   | MAB374      | WB          |
| GFAP                             | Dako           | Rabbit  | 1/600    | Z0334       | ICC/IHC     |
| GFAP                             | Millipore      | Chicken | 1/600    | AB5541      | ICC/IHC     |
| GLAST-PE                         | Miltenyi       | Mouse   | 1/20     | 130-095-821 | FC          |
| IGF1R                            | Cell Signaling | Rabbit  | 1/500    | 3027        | WB          |
| IGF2R                            | Abcam          | Mouse   | 1/1000   | ab2733      | WB          |
| IR (4B8)                         | Cell Signaling | Rabbit  | 1/200    | 3025        | WB          |
| Ki67                             | Abcam          | Rabbit  | 1/100    | ab15580     | ICC/IHC     |
| MCM2                             | Santa Cruz     | Goat    | 1/300    | Sc-9839     | ICC         |
| Nestin                           | Hybridoma Bank | Mouse   | 1/4      | rat-401     | ICC         |
| O4                               | Hybridoma Bank | Mouse   | 1/2      | rip         | ICC         |
| O4-405                           | R&D            | Rat     | 1/50     | FAB1326V    | FC          |
| OLIG2                            | Millipore      | Rabbit  | 1/300    | AB9610      | ICC         |
| p57                              | Sigma          | Rabbit  | 1/1000   | SAB4500071  | WB/ICC/IHC  |
| pAkt (Ser473)                    | Cell Signaling | Rabbit  | 1/2000   | 9271        | ICC         |
| PathScan Multiplex WB cocktail I | Cell Signaling | Rabbit  | 1/400    | 5301        | WB          |
| pYR1161IGFIR                     | Abcam          | Rabbit  | 1/400    | ab5681      | WB          |
| pY972IR                          | Abcam          | Rabbit  | 1/500    | ab5678      | WB          |
| pMAPK (Erk1/2)                   | Cell Signaling | Rabbit  | 1/3000   | 9102        | ICC         |
| S100 $\beta$                     | Dako           | Rabbit  | 1/300    | Z0311       | ICC/IHC     |
| tAkt                             | Cell Signaling | Rabbit  | 1/1000   | 4691        | WB          |
| Ter119-BUV421                    | BD Biosciences | Rat     | 1/200    | 563998      | FC          |
| tMAPK                            | Cell Signaling | Rabbit  | 1/1000   | 9102        | WB          |

ICC, Immunocytochemistry    IHC, Immunohistochemistry    WB, Western-blot    FC, Flow cytometry

**Table S3. List of secondary antibodies used.**

| Antibody                             | Source                 | Dilution | Cat #        | Application |
|--------------------------------------|------------------------|----------|--------------|-------------|
| Alexa Fluor® 488 Donkey Anti-Chicken | Jackson ImmunoResearch | 1/600    | 703-545-155  | ICC/IHC     |
| Alexa Fluor® 488 Donkey Anti-Mouse   | Molecular Probes       | 1/600    | A-21202      | ICC/IHC     |
| Alexa Fluor® 488 Donkey Anti-Rabbit  | Jackson ImmunoResearch | 1/600    | 711-547-003  | ICC/IHC     |
| Alexa Fluor® 647 Donkey Anti-Chicken | Jackson ImmunoResearch | 1/600    | 703-605-155  | ICC/IHC     |
| Alexa Fluor® 647 Donkey Anti-Mouse   | Jackson ImmunoResearch | 1/600    | 715- 605-151 | ICC/IHC     |
| Alexa Fluor® 647 Donkey Anti-Rabbit  | Jackson ImmunoResearch | 1/600    | 711-607-003  | ICC/IHC     |
| Alexa Fluor® 647 Donkey Anti-Goat    | Jackson ImmunoResearch | 1/600    | 705-605-003  | ICC/IHC     |
| Biotinylated Horse Anti-Mouse        | Vector                 | 1/1000   | BA2000       | ICC         |
| Cy3-Donkey Anti-Mouse                | Jackson ImmunoResearch | 1/800    | 715-165-151  | ICC/IHC     |
| Cy3-Donkey Anti-Rabbit               | Jackson ImmunoResearch | 1/800    | 711-165-152  | ICC/IHC     |
| Cy3-Donkey Anti-Rat                  | Jackson ImmunoResearch | 1/600    | 712-165-153  | ICC/IHC     |
| Cy3-Streptavidin                     | Jackson ImmunoResearch | 1/2000   | 016-160-084  | ICC         |
| Goat Anti-Mouse IgG-HRP              | Dako                   | 1/5000   | P0447        | WB          |
| Goat Anti-Rabbit IgG-HRP             | Santa Cruz             | 1/5000   | sc-2004      | WB          |

ICC, Immunocytochemistry IHC, Immunohistochemistry WB, Western-blot

**Table S4. List of Taqman probes used.**

| Gene          | TaqMan Code<br>(Applied Biosystems) |
|---------------|-------------------------------------|
| <i>Cdkn1a</i> | Mm04205640_g1                       |
| <i>Cdkn1b</i> | Mm00438168_m1                       |
| <i>Cdkn1c</i> | Mm01272135_g1                       |
| <i>Gapdh</i>  | Mm99999915_g1                       |
| <i>Gfap</i>   | Mm01253033_m1                       |
| <i>Igfr1</i>  | Mm00802831_m1                       |
| <i>Igfr2</i>  | Mm00439576_m1                       |
| <i>Insr</i>   | Mm01211875_m1                       |
| <i>Nes</i>    | Mm00450205_m1                       |
| <i>Olig2</i>  | Mm01210556_m1                       |
| <i>S100β</i>  | Mm00485897_m1                       |
| <i>Tubb3</i>  | Mm00727586_s1                       |
